# Supplementary material for: High-resolution CTCF footprinting reveals impact of chromatin state on cohesin extrusion dynamics
Source: PubMed Central journal article supplement (PMC10634716; doi:10.1101/2023.10.20.563340), 2023-10-28
Supplement: NIHPP2023.10.20.563340V3-supplement-1.pdf [file NIHPP2023.10.20.563340V3-supplement-1.pdf]

601 **Supplementary Figures**

602

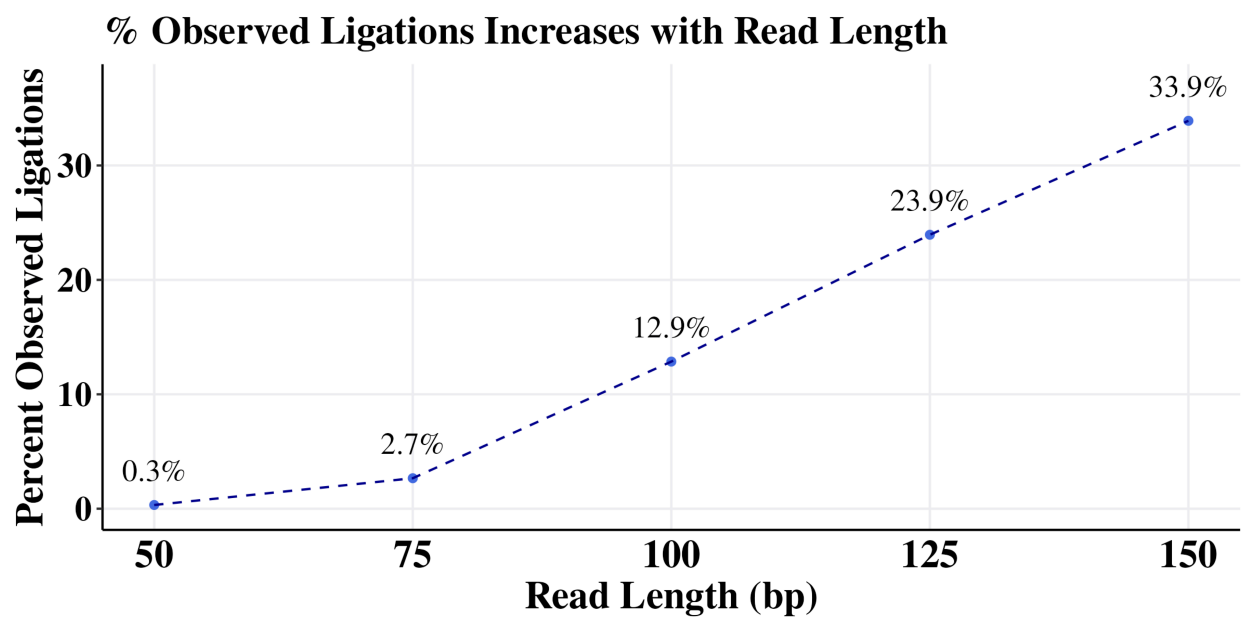

603

604 **Supplementary Figure 1.** Percent observed ligations increases with read length.

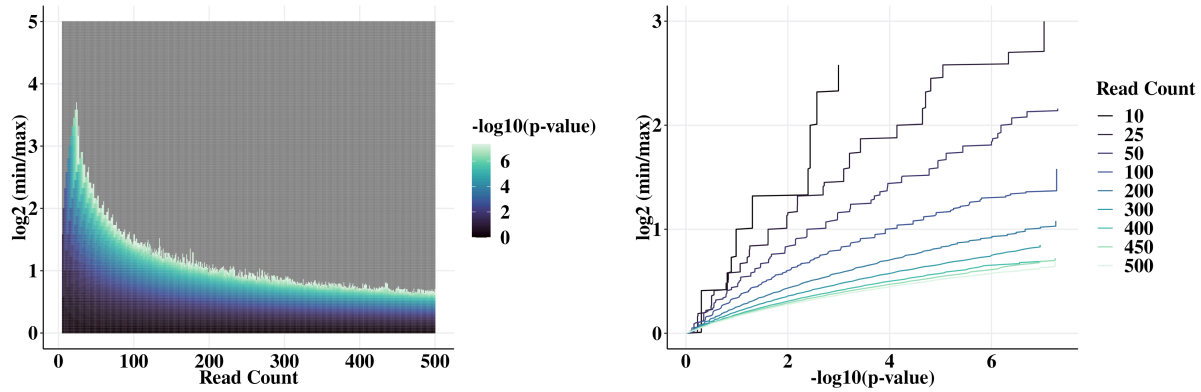

605  
606 **Supplementary Figure 2.** The probability of observing a high *FactorFinder* statistic under the  
607 null hypothesis is higher at low read counts.

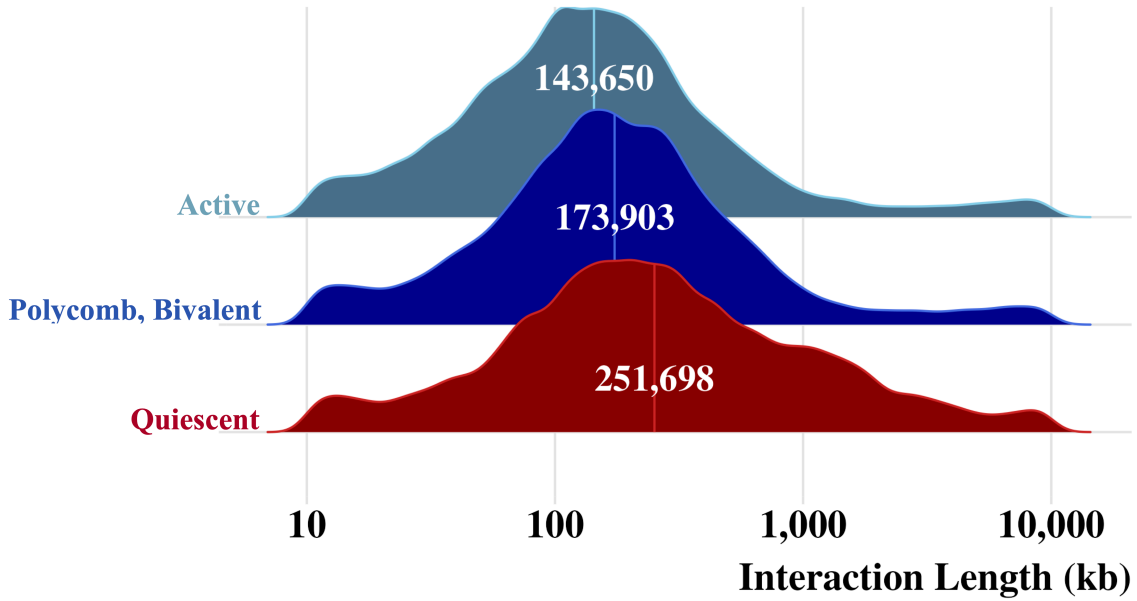

608  
609 **Supplementary Figure 3.** Cohesin extrudes significantly further through quiescent regions than  
610 active regions.

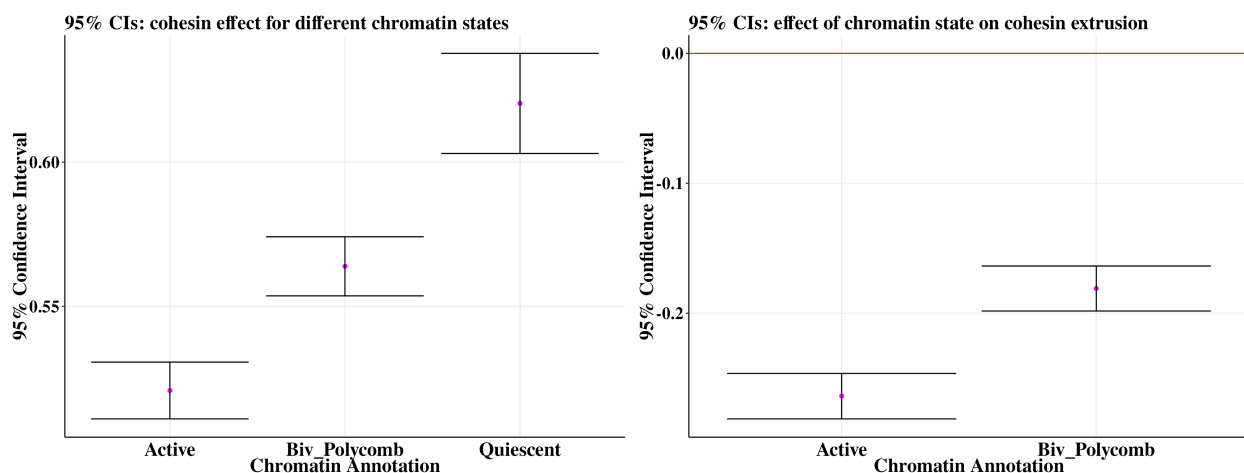

611  
612 **Supplementary Figure 4.** Controlling for locus-specific variation with linear mixed models  
613 does not attenuate the relationship between chromatin state and extruded loop size. Note that for  
614 the figure on the right, the group that active and bivalent polycomb are being compared to is  
615 quiescent.

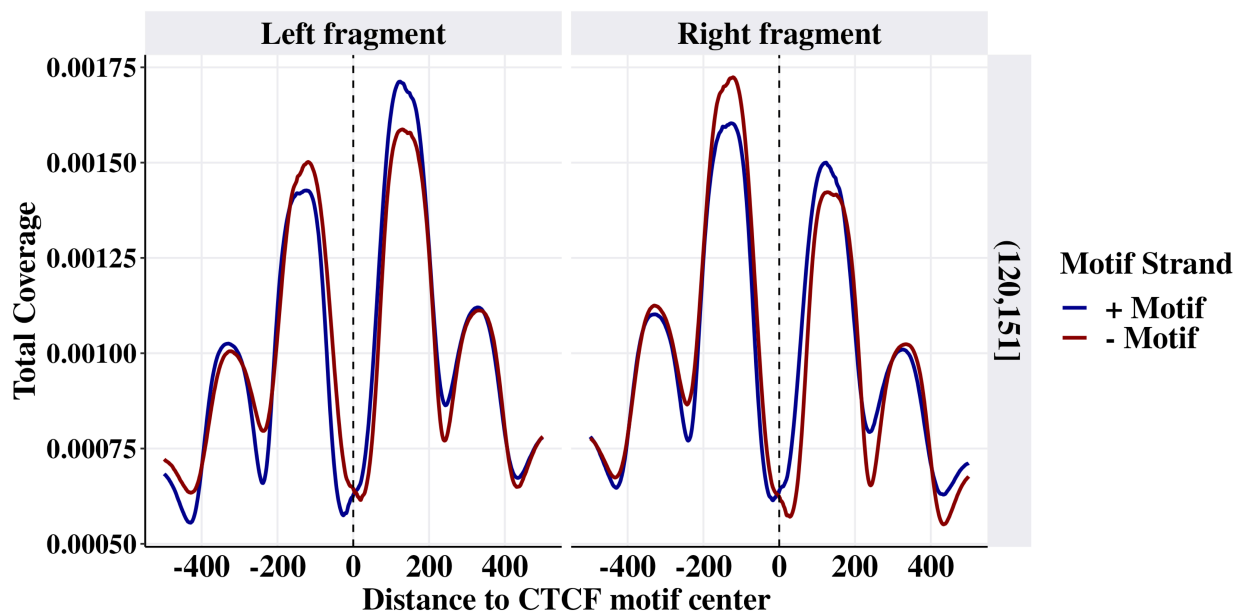

616  
617 **Supplementary Figure 5.** Nucleosomes are preferentially positioned inside the loop.
